# Supplementary material for: Development of a Glycosaminoglycan Derived, Selectin Targeting Anti-Adhesive Coating to Treat Endothelial Cell Dysfunction
Source: PubMed Central journal article supplement (PMC5490393; doi:10.3390/ph10020036), 2017-03-29
Supplement: pharmaceuticals-10-00036-s001.pdf [file pharmaceuticals-10-00036-s001.pdf]

# Supplemental Materials: Development of a Glycosaminoglycan Derived, Selectin Targeting Anti-Adhesive Coating to Treat Endothelial Cell Dysfunction

James R. Wodicka <sup>1,2</sup>, Andrea M. Chambers <sup>1</sup>, Gurneet S. Sangha <sup>1</sup>, Craig J. Goergen <sup>1</sup> and Alyssa Panitch <sup>1,3,\*</sup>

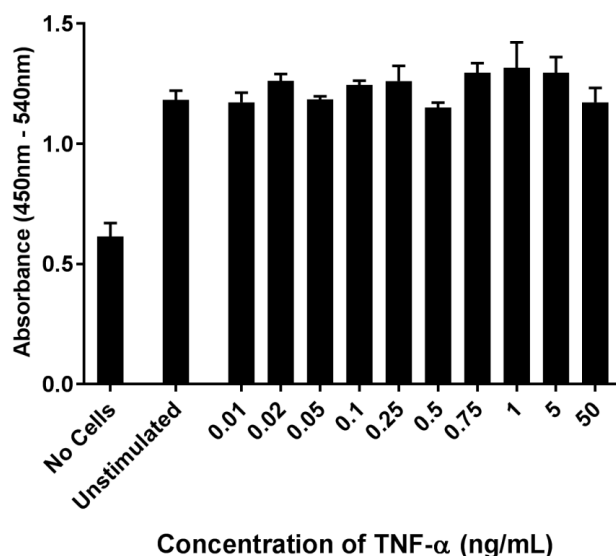

**Figure S1.** Selectin expression on ECs when stimulated with varying concentrations of TNF- $\alpha$ . Expression was quantified using primary anti-E-selectin and secondary HRP-conjugated antibodies. Selectin levels did not change when stimulated with TNF- $\alpha$ .  $n = 3$ ;  $p < 0.05$ .

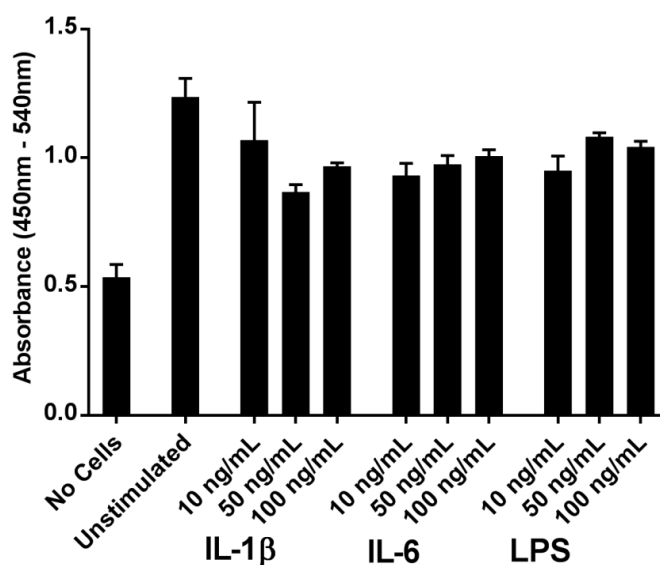

**Figure S2.** Selectin expression on ECs when stimulated with varying concentrations of IL-1 $\beta$ , IL-6 and LPS. Expression was quantified using primary anti-E-selectin and secondary HRP-conjugated antibodies. Proinflammatory stimuli failed to increase selectin expression on the EC surface.  $n = 3$ ;  $p < 0.05$ .

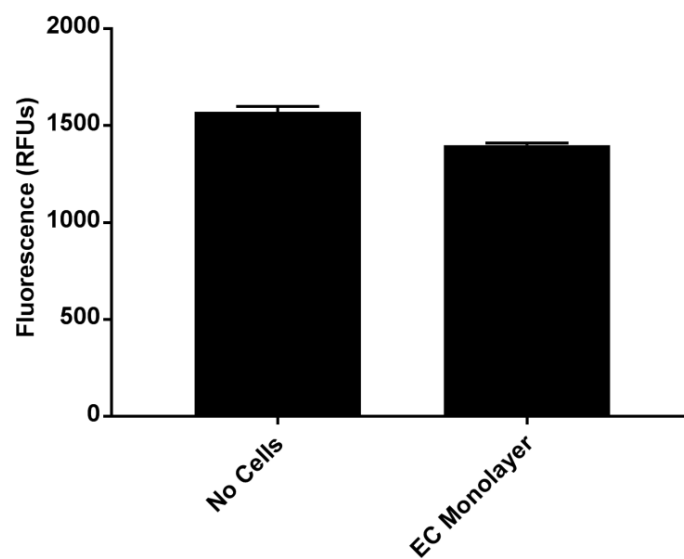

**Figure S3.** EC monolayer permeability in unstimulated conditions. RITC-dextran was added to the upper chamber of Transwells with and without an EC monolayer. Following incubation, a sample from the lower chamber was collected and fluorescence (Ex: 520 nm; Em: 590 nm) was recorded. Despite ECs present, a majority of the RITC-dextran was able to pass through the Transwell, indicating that the monolayer was not fully intact.  $n = 2$ ;  $p < 0.05$ .
